# Supplementary material for: A design rule for two-dimensional van der Waals heterostructures with unconventional band alignments
Source: Royal Society of Chemistry journal article supplement (doi:10.1039/c9cp06465f), 2020-01-01
Supplement: c9cp06465f1.pdf [file c9cp06465f1.pdf]

## Supporting Information

### Design Rule for Two-Dimensional van der Waals Heterostructures with Unconventional Band Alignments

Yuan Si<sup>1</sup>, Hong-Yu Wu<sup>1</sup>, Ji-Chun Lian<sup>1</sup>, Wei-Qing Huang<sup>1,#</sup>, Wang-Yu Hu<sup>2</sup>, Gui-Fang Huang<sup>1,\*</sup>

1. Department of Applied Physics, School of Physics and Electronics, Hunan University, Changsha 410082, China

2 School of Materials Science and Engineering, Hunan University, Changsha 410082, China

---

#.Corresponding author. *E-mail address*: wqhuang@hnu.edu.cn

\*.Corresponding author. *E-mail address*: gfhuang@hnu.edu.cn

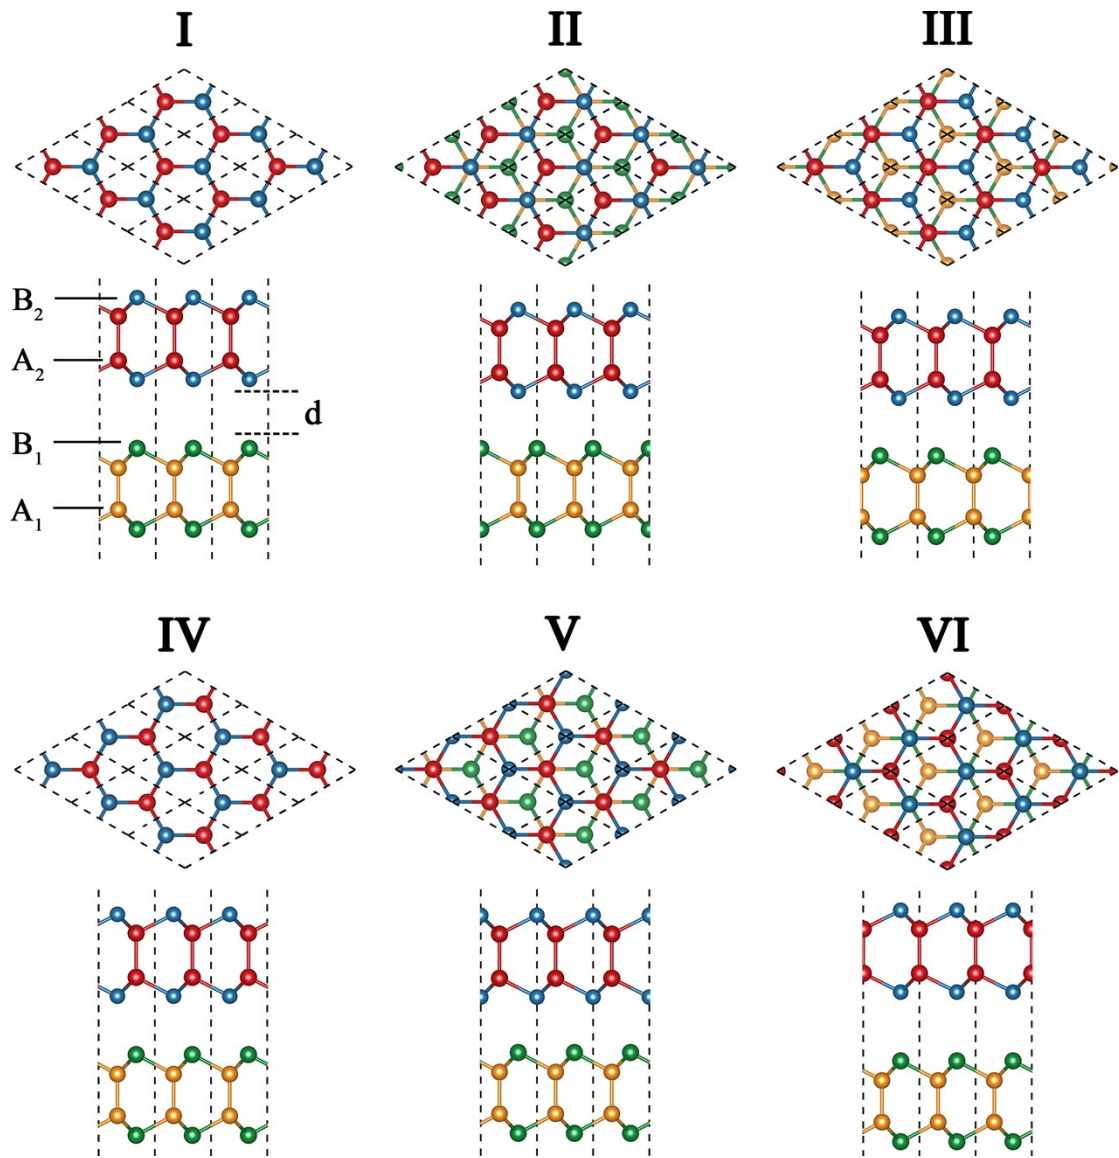

**Fig. S1. Stacking patterns of the heterostructures.** Top and side views of six different stacking of the group IV-V heterostructures. A and B denote the elements from the group-IV and V, respectively. The unit cells of the monolayer and heterostructure are shown in black dash line.

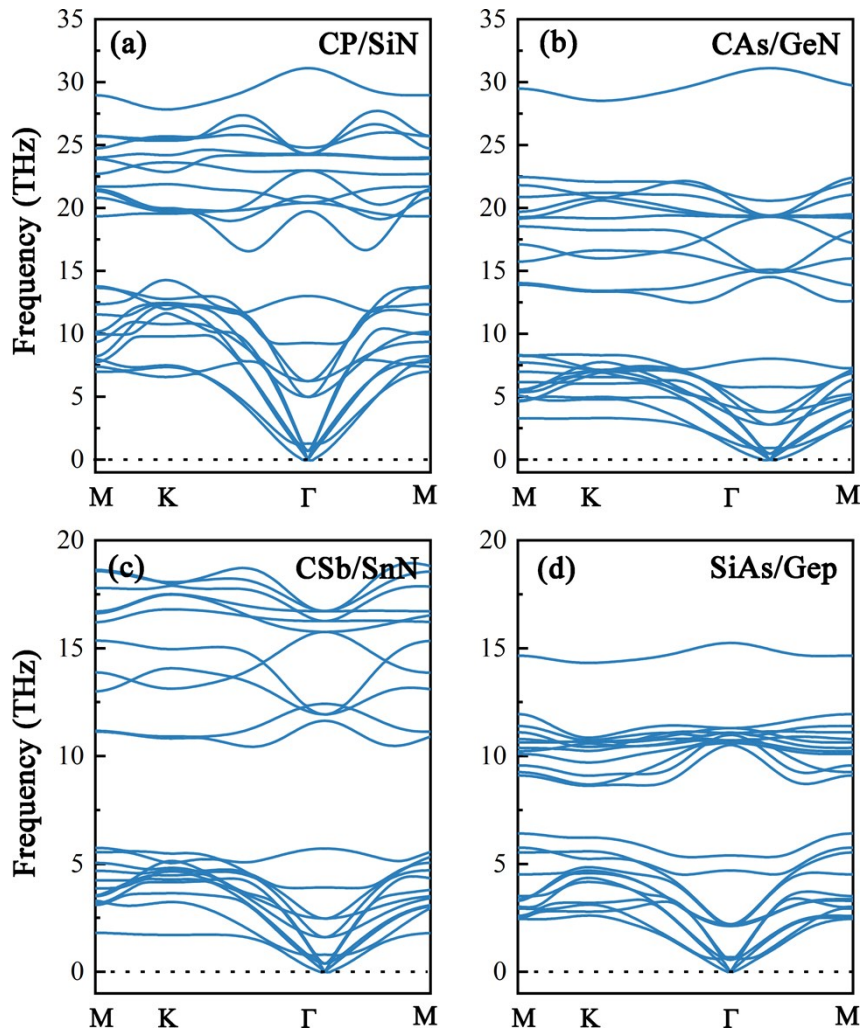

**Fig. S2. Phonon dispersions of four group IV-V heterostructure.** The phonon dispersion curves of (a) CP/SiN, (b) CAs/GeN, (c) CSb/SnN and (d) SiAs/GeP.

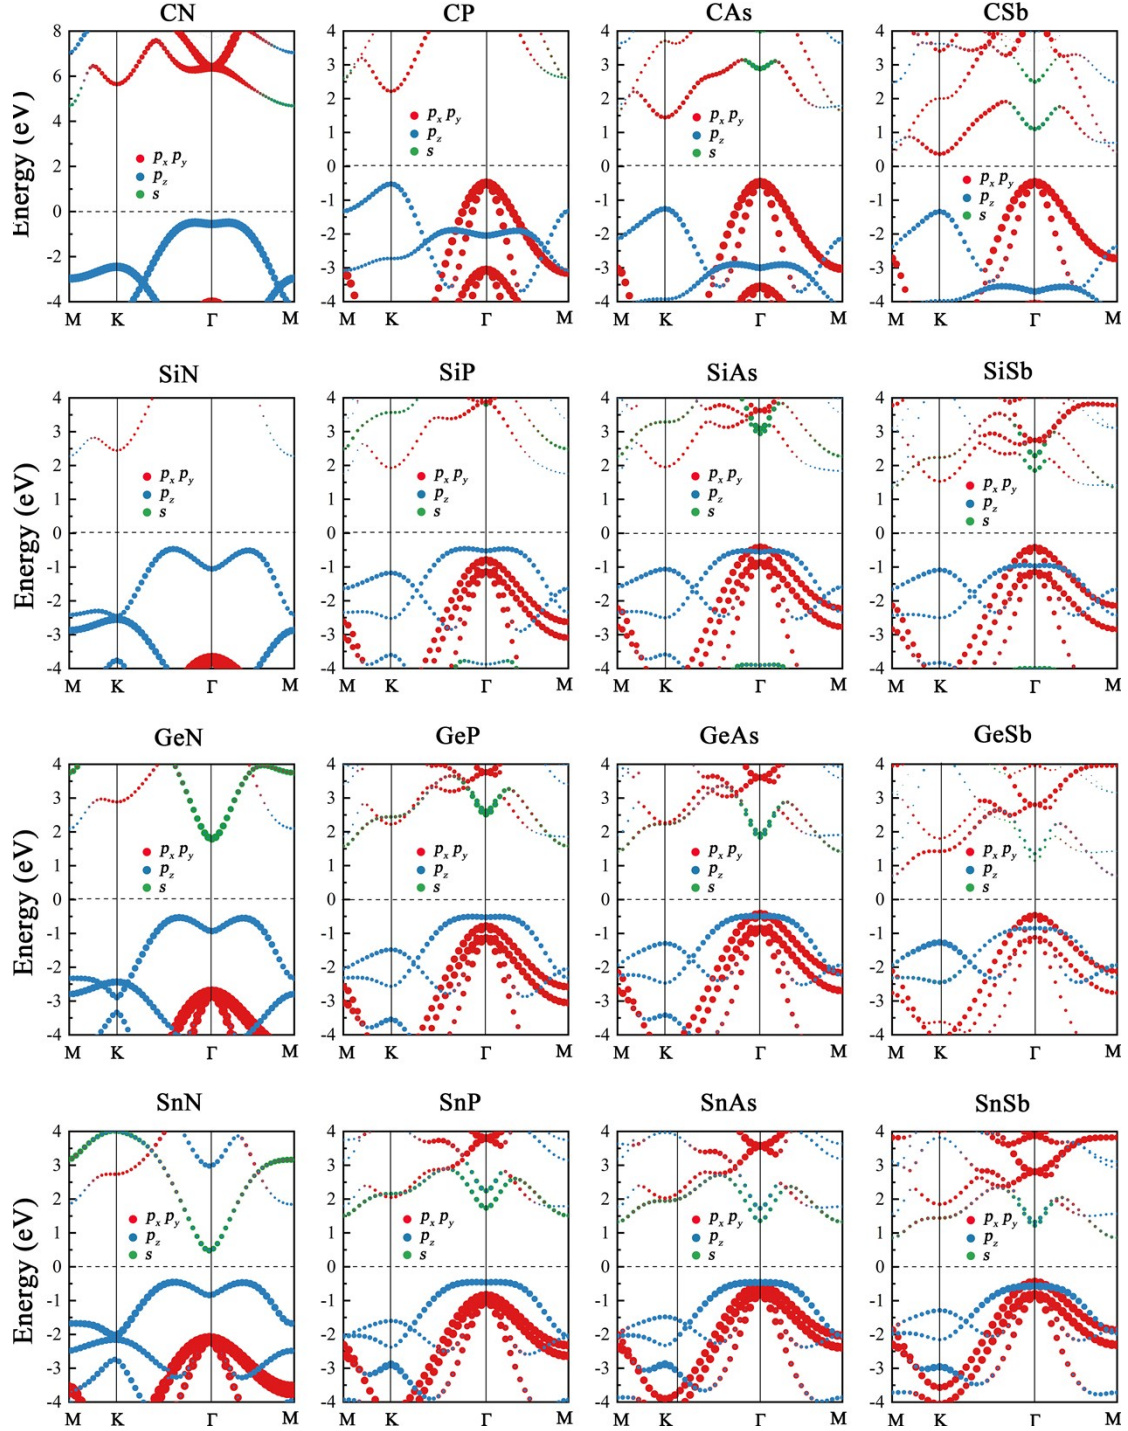

**Fig. S3. Electronic structures of group IV-V monolayers.** The projected band structures of 16 group IV-V monolayers. The red dots denote the  $p_x$  and  $p_y$  orbitals, while blue and green dots represent  $p_z$  and  $s$  orbitals, respectively. Black dash line denotes the Fermi level.

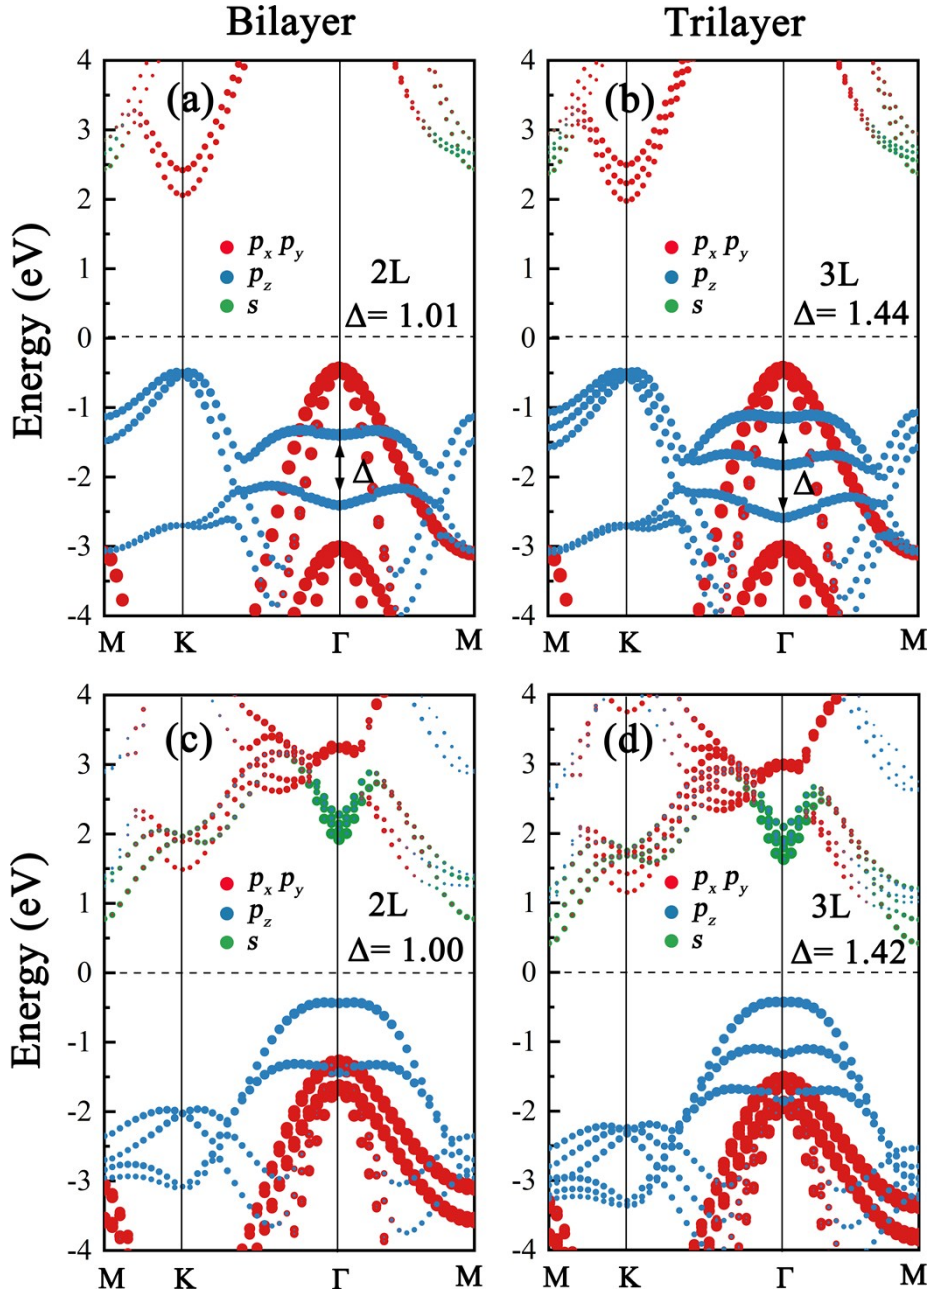

**Fig. S4. Electronic structures of multilayer CP and GeP.** Projected band structures of bilayer and trilayer of (a,b) CP and (c,d) GeP, respectively. The red dots represent the  $p_x$  and  $p_y$  orbitals, while blue and green dots represent  $p_z$  and  $s$  orbitals, respectively. Black dashed line represents the Fermi level.  $\Delta$  (eV) is the energy difference between the QB with highest and lowest energy at  $\Gamma$  point.

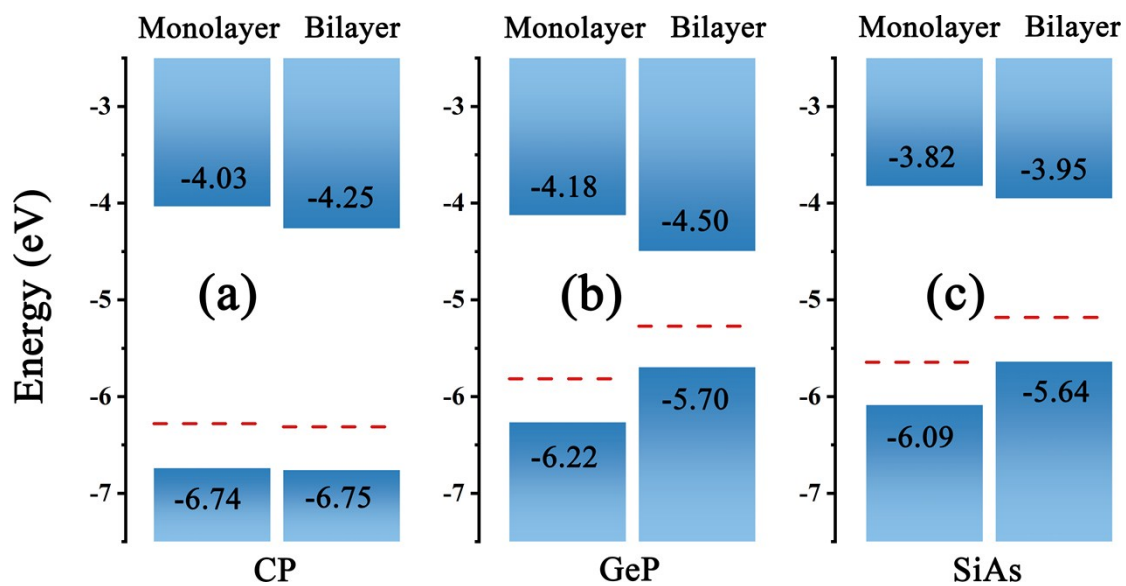

**Fig. S5. Schematic diagrams of band alignment of three group IV-V semiconductors.** Band edge positions of (a) CP (b) GeP and (c) SiAs monolayer and bilayer, respectively. The vacuum level is set to 0 eV. The red dashed line represents the Fermi level.

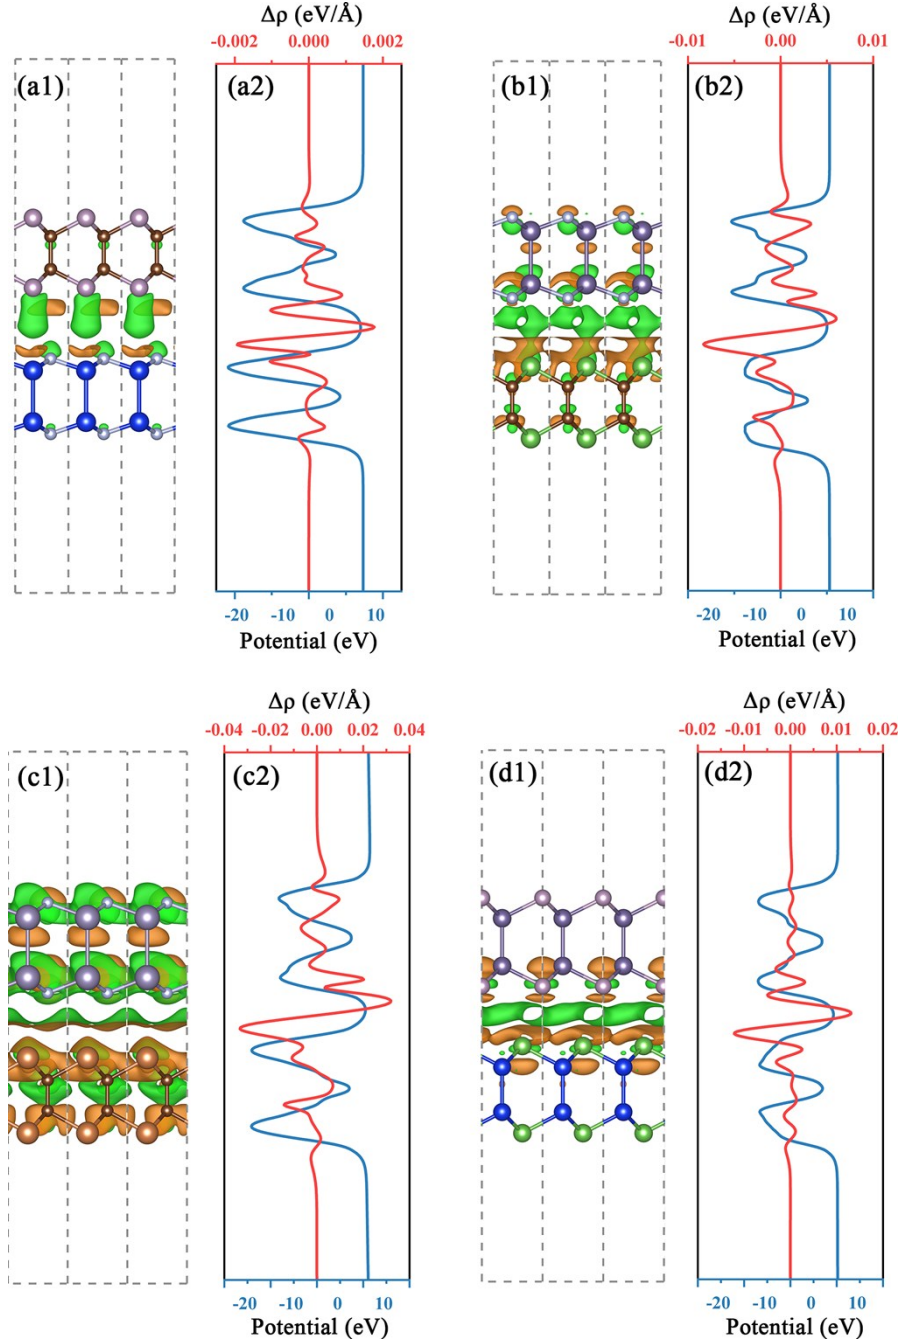

**Fig. S6. The interfacial charge transfer for the group IV-V heterostructures (a1-d1)** Charge density difference of (a1) CP/SiN, (b1) CAs/GeN, (c1) CSb/SnN and (d1) SiAs/GeP heterostructures with the isovalue of  $0.007 \text{ e}/\text{\AA}^3$ . The bottom of the AB ( $A_1B_1/A_2B_2$ ) heterostructure is  $A_1B_1$  layer, while the upper is  $A_2B_2$  layer. Green and orange block represent electron accumulation and depletion in the space. (a2-d2) The corresponding profiles of planar averaged charge density difference (red line) and planar averaged self-consistent electrostatic potential (blue line) displayed.

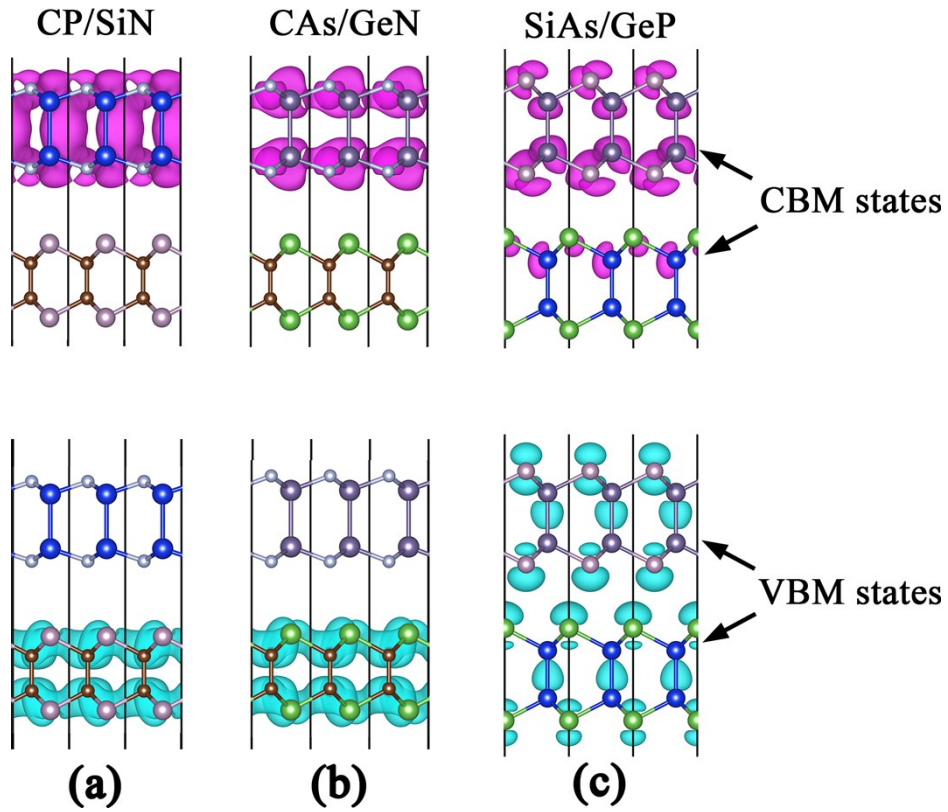

**Fig. S7. Distributions of the band edge orbitals of group IV-V heterostructures.** Charge distributions of VBM states (blue) and CBM states (pink) of (a) CP/SiN, (b) CAs/GeN and (c) SiAs/GeP heterostructures with an isovalue of  $0.005 \text{ e}/\text{\AA}^3$ . The bottom of the AB ( $A_1B_1/A_2B_2$ ) heterostructure is  $A_1B_1$  layer, while the upper is  $A_2B_2$  layer.



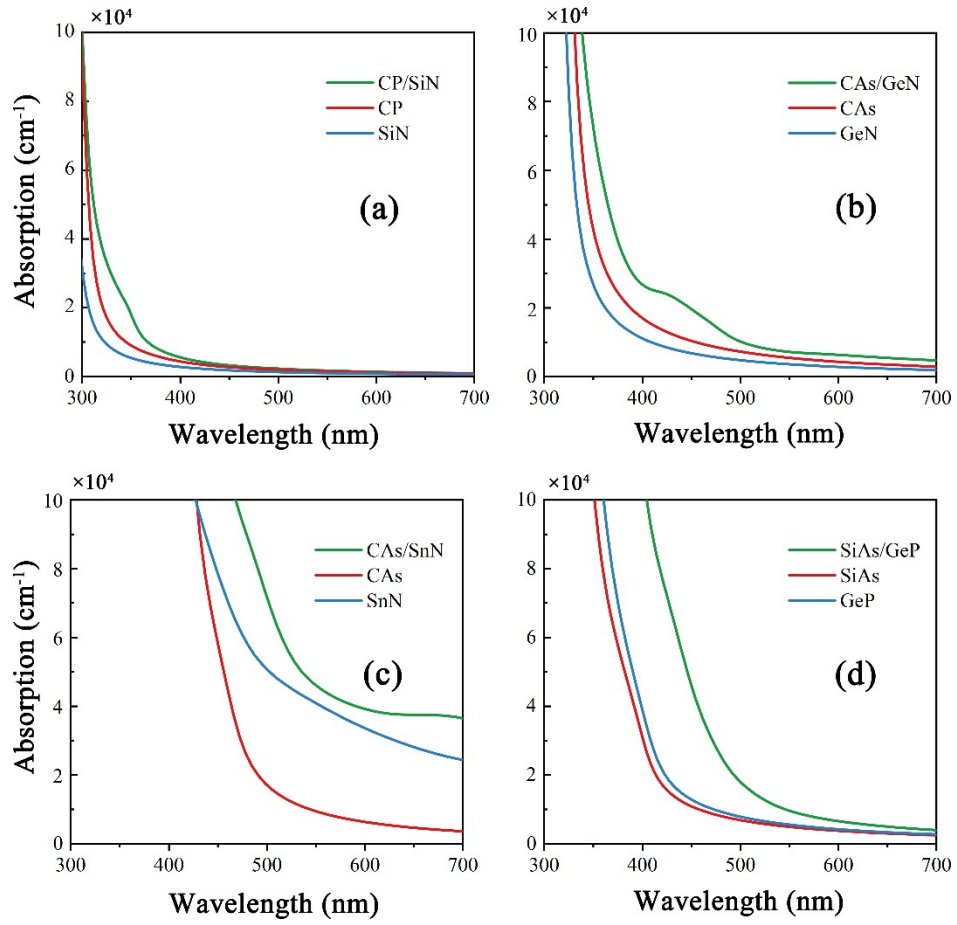

**Fig. S8. Optical properties of group IV-V heterostructures.** The absorption spectrums of (a) CP/SiN, (b) CAs/GeN, (c) CSb/SnN and (d) SiAs/GeP heterostructures and corresponding monolayers. The green, red and blue lines represent the AB ( $A_1B_1/A_2B_2$ ) heterostructure,  $A_1B_1$  layer and  $A_2B_2$  layer, respectively.

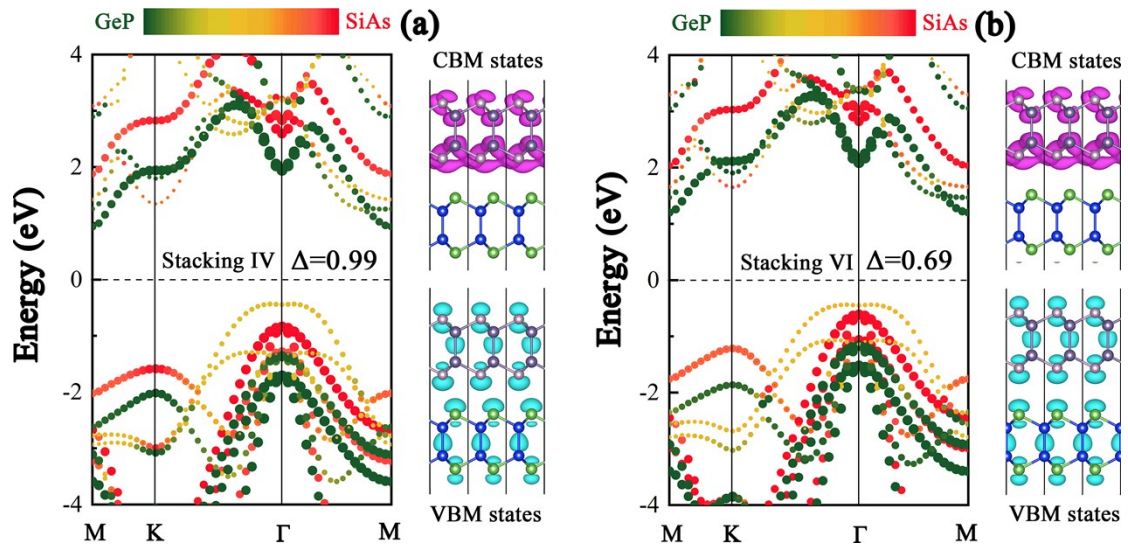

**Fig. S9. Effects of different stacking patterns on electronic structure of SiAs/GeP heterostructure.** (a,b) Projected band structures (left panel) and corresponding charge distributions (right panel) of VBM states (blue) and CBM states (pink) of (a) stacking IV and (b) VI of SiAs/GeP heterostructure. The upper of the heterostructure is GeP layer, and the bottom is SiAs layer. The isovalues of charge distributions are  $0.005 \text{ e}/\text{\AA}^3$ .

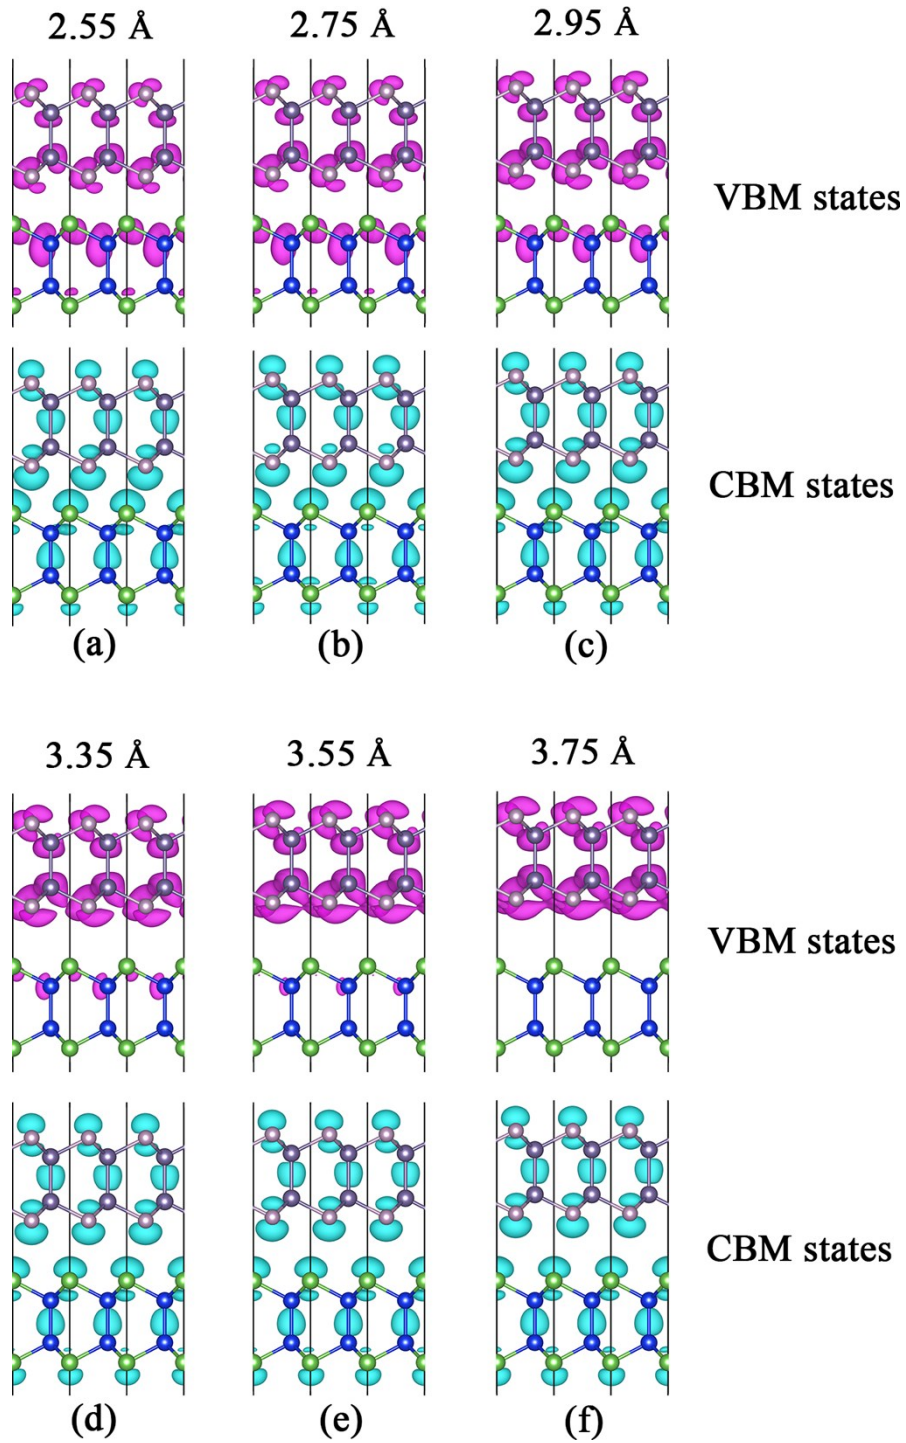

**Fig. S10. Effects of vertical strain on the distributions of the band edge orbitals of SiAs/GeP heterostructure.** The charge distribution of VBM states (blue) and CBM states (pink) for (a-c) decrease and (d-f) increase of interlayer distance. The upper of the heterostructure is GeP layer, and the bottom is SiAs layer. The isovalues of charge distributions are  $0.005 e/\text{\AA}^3$ .

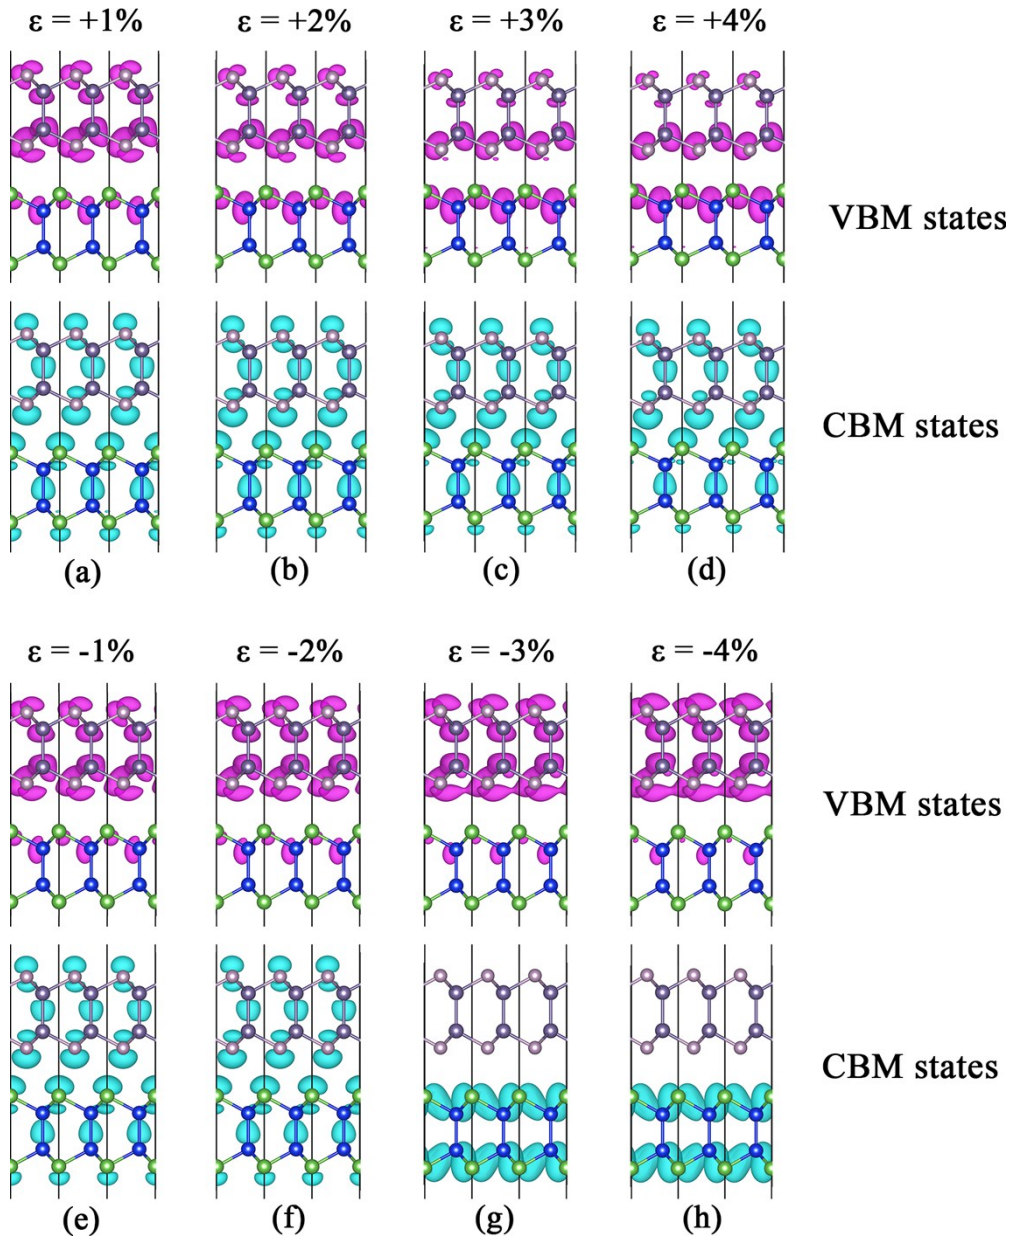

**Fig. S11. Effects of biaxial strain on the distributions of the band edge orbitals of SiAs/GeP heterostructure.** The charge distribution of VBM states (blue) and CBM states (pink) for (a-d) tensile and (e-h) compressive biaxial strain. The upper of the heterostructure is GeP layer, and the bottom is SiAs layer. The isovalues of charge distributions are  $0.005 e/\text{\AA}^3$ .

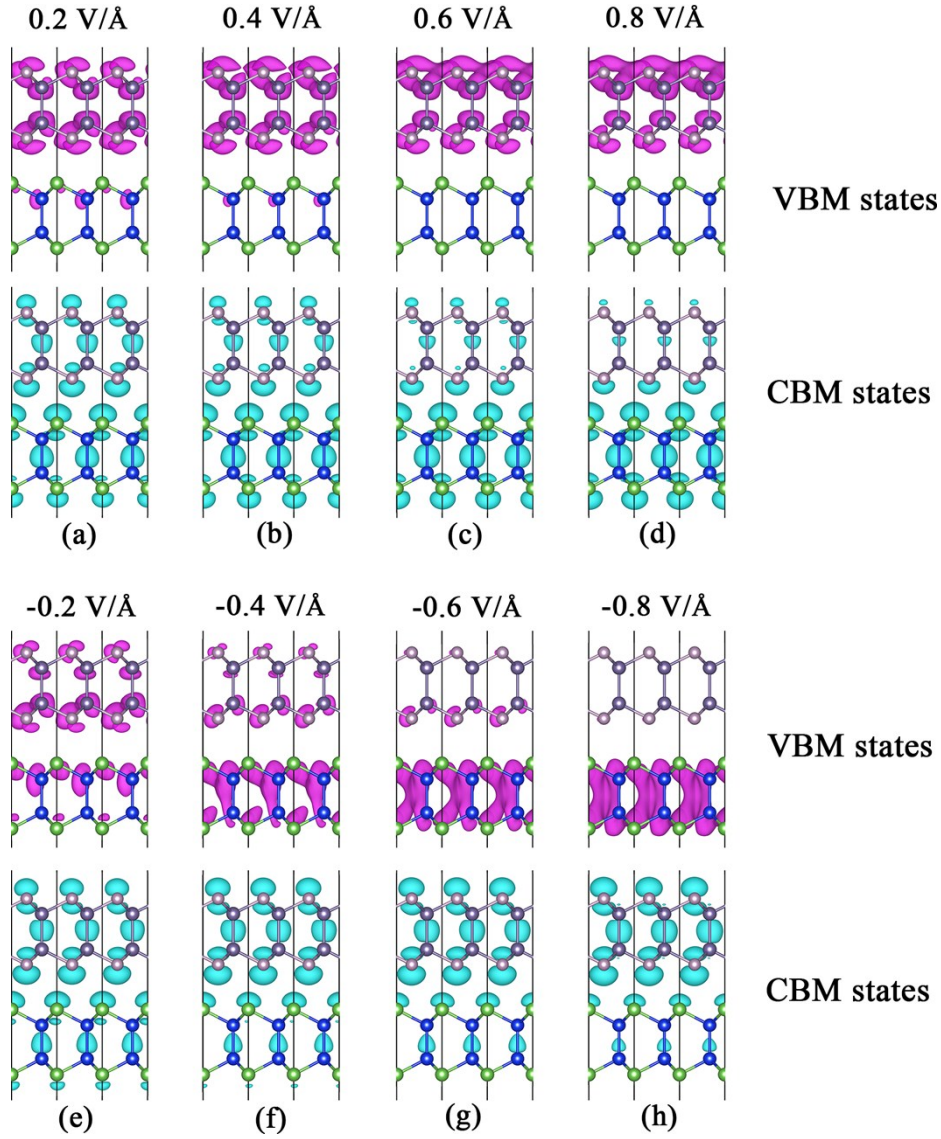

**Fig. S12. Effects of electric field on the distributions of the band edge orbitals of SiAs/GeP heterostructure.** The charge distribution of VBM states (blue) and CBM states (pink) for (a-d) positive and (e-h) negative electric field. The upper of the heterostructure is GeP layer, and the bottom is SiAs layer. The isovalues of charge distributions are  $0.005 e/\text{\AA}^3$ .

**Table S1.** Calculated lattice constant ( $\text{\AA}$ ) and band gap  $E_g$  (eV) for group IV-V AB monolayers.

| Monolayer | a ( $\text{\AA}$ ) | $E_g$ (eV) |
|-----------|--------------------|------------|
| CN        | 2.37               | 5.18       |
| CP        | 2.88               | 2.71       |
| CAs       | 3.10               | 1.91       |
| CSb       | 3.39               | 0.83       |
| SiN       | 2.89               | 2.74       |
| SiP       | 2.22               | 2.22       |
| SiAs      | 3.69               | 2.27       |
| SiSb      | 4.01               | 1.77       |
| GeN       | 3.09               | 2.33       |
| GeP       | 3.65               | 2.04       |
| GeAs      | 3.81               | 1.84       |
| GeSb      | 4.11               | 1.17       |
| SnN       | 3.41               | 0.94       |
| SnP       | 3.94               | 1.97       |
| SnAs      | 4.07               | 1.79       |
| SnSb      | 4.37               | 1.31       |

**Table S2.** The energy difference  $\Delta E$  (meV) for six stacking configurations of group IV-V AB vdW heterostructures.

| Heterostructure | I     | II   | III  | IV    | V     | VI    |
|-----------------|-------|------|------|-------|-------|-------|
| CP/SiN          | 30.22 | 2.53 | 6.52 | 0     | 10.05 | 29.60 |
| CAs/GeN         | 39.73 | 5.12 | 2.00 | 0     | 5.81  | 39.63 |
| CSb/SnN         | 56.66 | 6.73 | 1.36 | 0     | 4.71  | 57.30 |
| SiAs/GeP        | 71.79 | 3.70 | 7.63 | 11.16 | 0     | 71.60 |

**Table S3.** Calculated lattice constant  $a$  (Å) and equilibrium interlayer distance  $d_0$  (Å) of four group IV-V heterostructures obtained for different functionals.

| Heterostructure | PBE+D3  |           | optPBE-vdW |           | optB86b-vdW |           | optB88-vdW |           |
|-----------------|---------|-----------|------------|-----------|-------------|-----------|------------|-----------|
|                 | $a$ (Å) | $d_0$ (Å) | $a$ (Å)    | $d_0$ (Å) | $a$ (Å)     | $d_0$ (Å) | $a$ (Å)    | $d_0$ (Å) |
| CP/SiN          | 2.89    | 3.36      | 2.91       | 3.40      | 2.89        | 3.39      | 2.91       | 3.40      |
| CAs/GeN         | 3.10    | 3.30      | 3.12       | 3.29      | 3.10        | 3.29      | 3.10       | 3.31      |
| CSb/SnN         | 3.40    | 3.21      | 3.43       | 3.21      | 3.40        | 3.20      | 3.43       | 3.20      |
| SiAs/GeP        | 3.67    | 3.15      | 3.70       | 3.12      | 3.66        | 3.10      | 3.68       | 3.12      |



**Table S4.** The interfacial charge transfer for four group IV-V heterostructures. The positive values and negative values represent charge accumulation and depletion, respectively.

| Heterostructure | Charge transfer (e) |          |
|-----------------|---------------------|----------|
|                 | $A_1B_1$            | $A_2B_2$ |
| CP/SiN          | -0.005              | 0.005    |
| CAs/GeN         | -0.011              | 0.011    |
| CSb/SnN         | -0.056              | 0.056    |
| SiAs/GeP        | -0.007              | 0.007    |
